# Supplementary material for: Time-restricted feeding improves blood glucose and insulin sensitivity in overweight patients with type 2 diabetes: a randomised controlled trial
Source: PubMed Central journal article supplement (PMC8499480; doi:10.1186/s12986-021-00613-9), 2021-10-07

Figure S1. The number of adherent days of the dietary regimen for the TRF group.

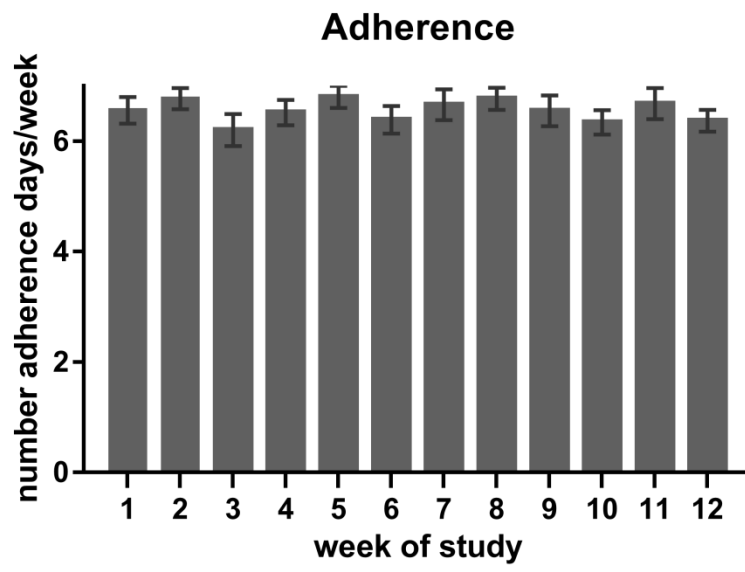

Supplement: 12986_2021_613_MOESM1_ESM.pdf [file 12986_2021_613_MOESM1_ESM.pdf]
